# Supplementary material for: Anatomical Variations in the Sinoatrial Nodal Artery: A Meta-Analysis and Clinical Considerations
Source: PubMed Central journal article supplement (PMC4743947; doi:10.1371/journal.pone.0148331), 2016-02-05

# Origin of the sinoatrial nodal artery (SANA)

## SANA arising from RCA

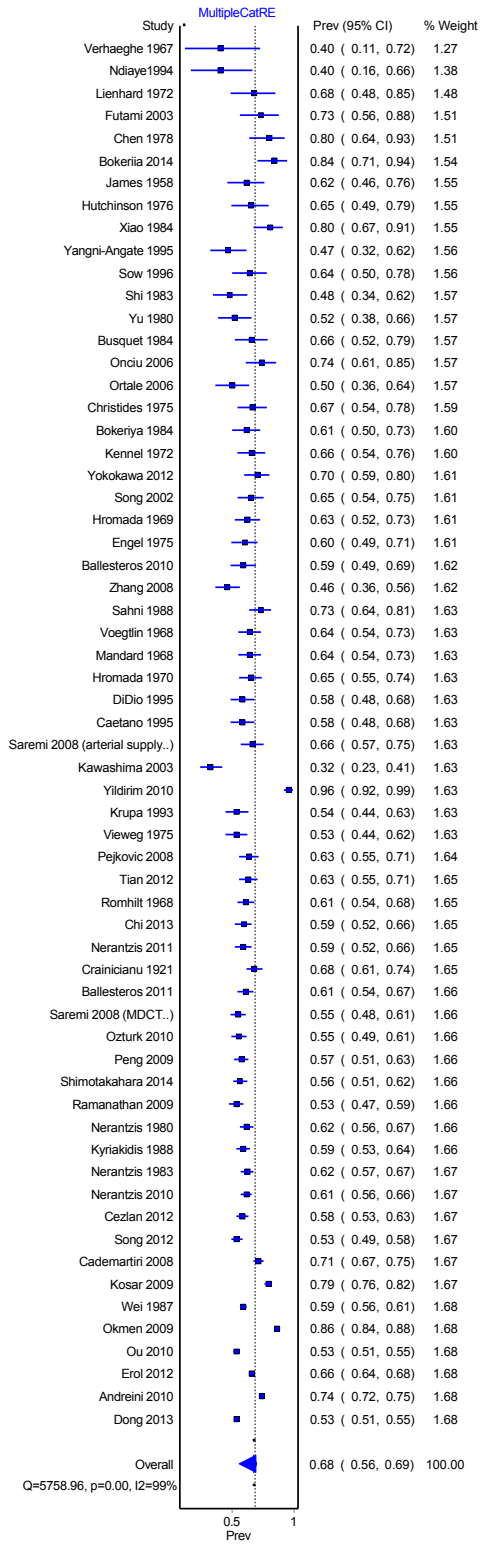

# SANa arising from LCX

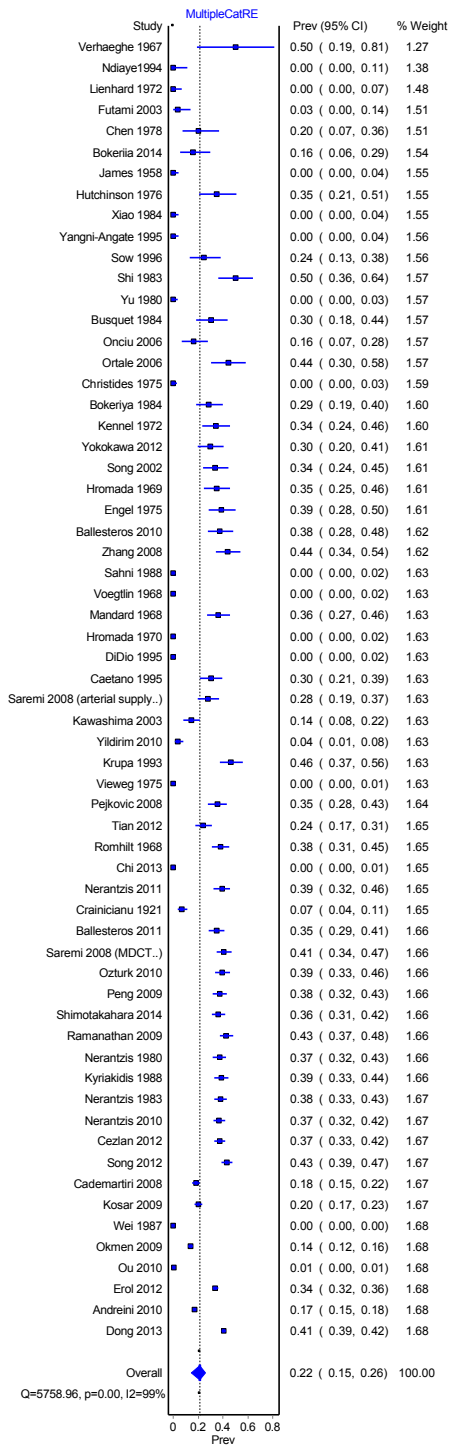

# SANa arising from LCA

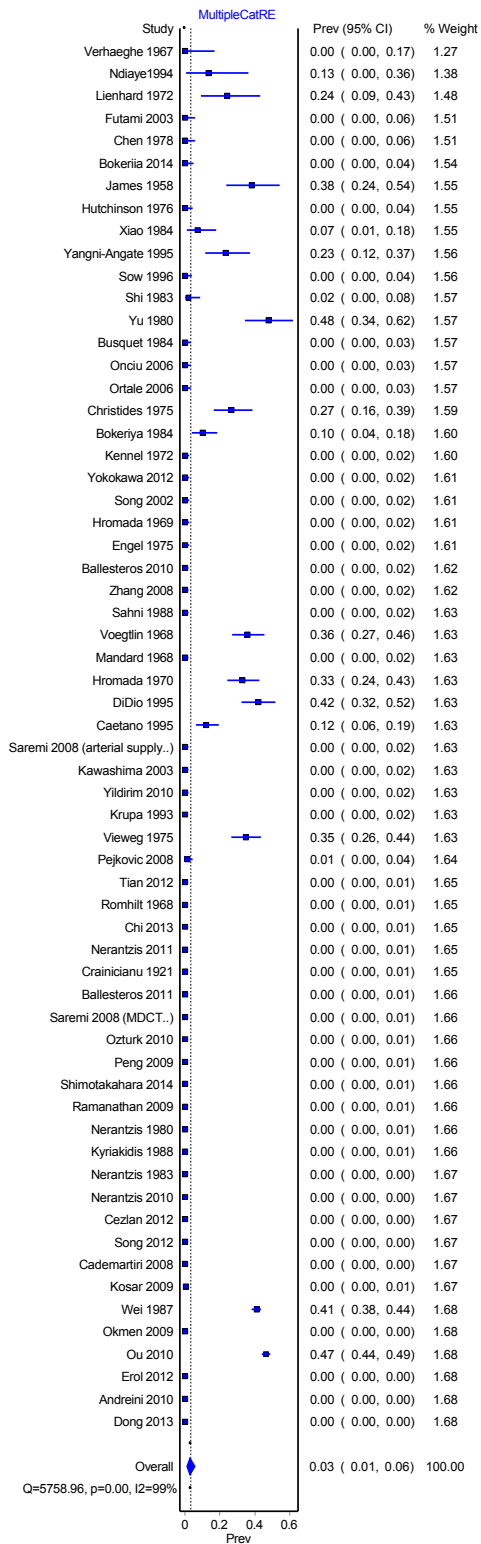

# SANa arising from aorta

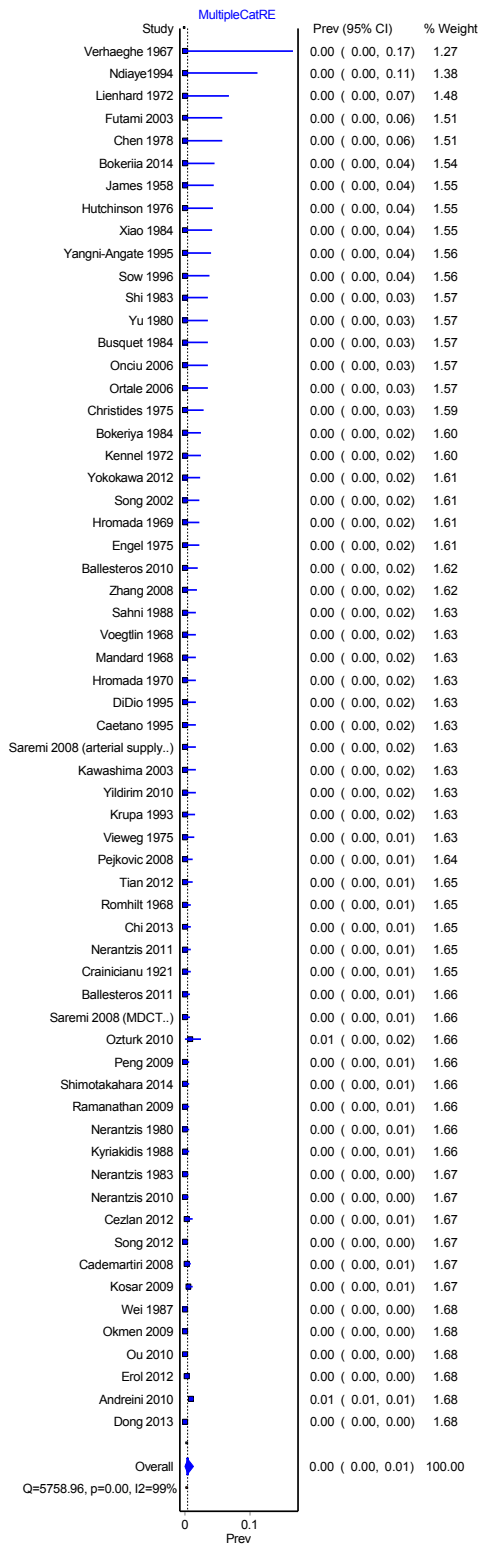

# SANa arising from bronchial artery

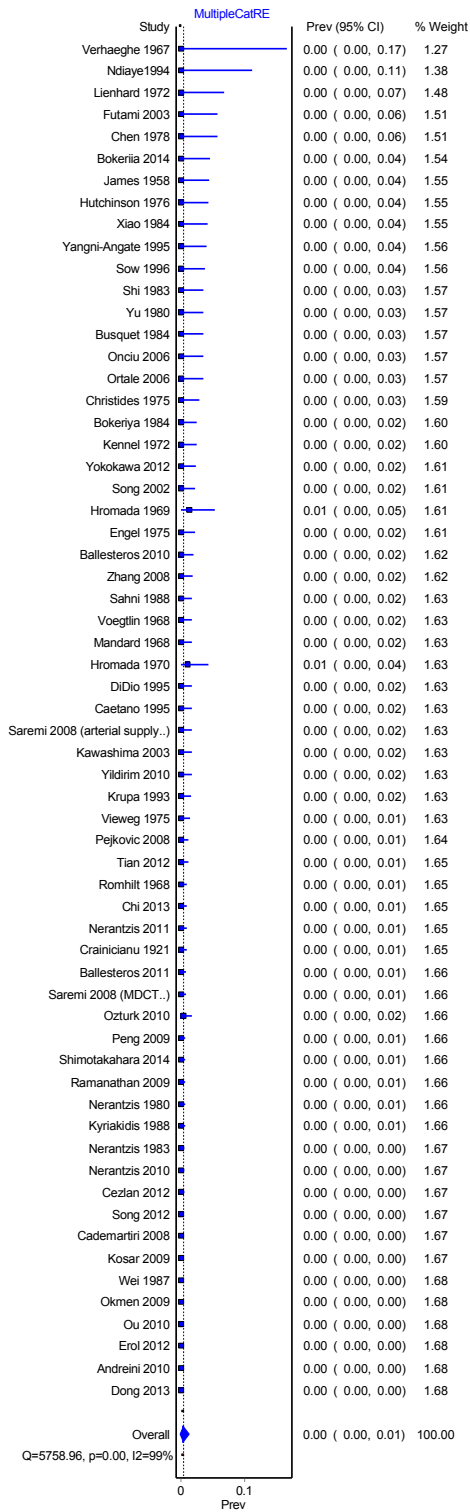

# Duplicated SANA. One from RCA, the other from LCX

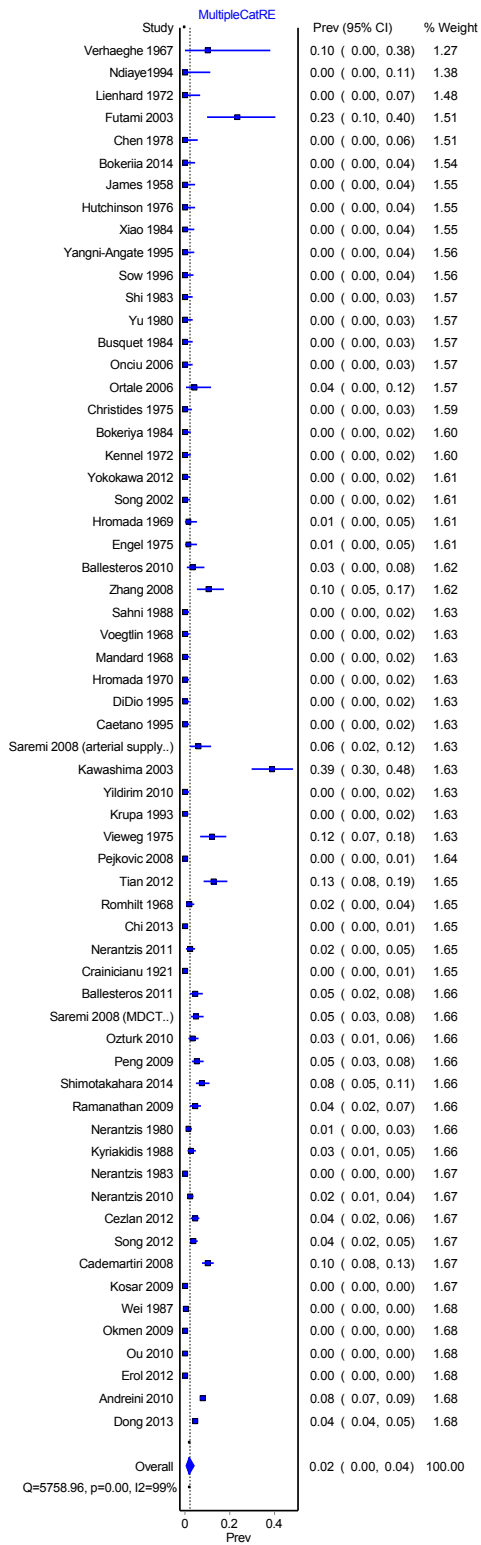

Duplicated SANA. One arising from RCA, the other arising from

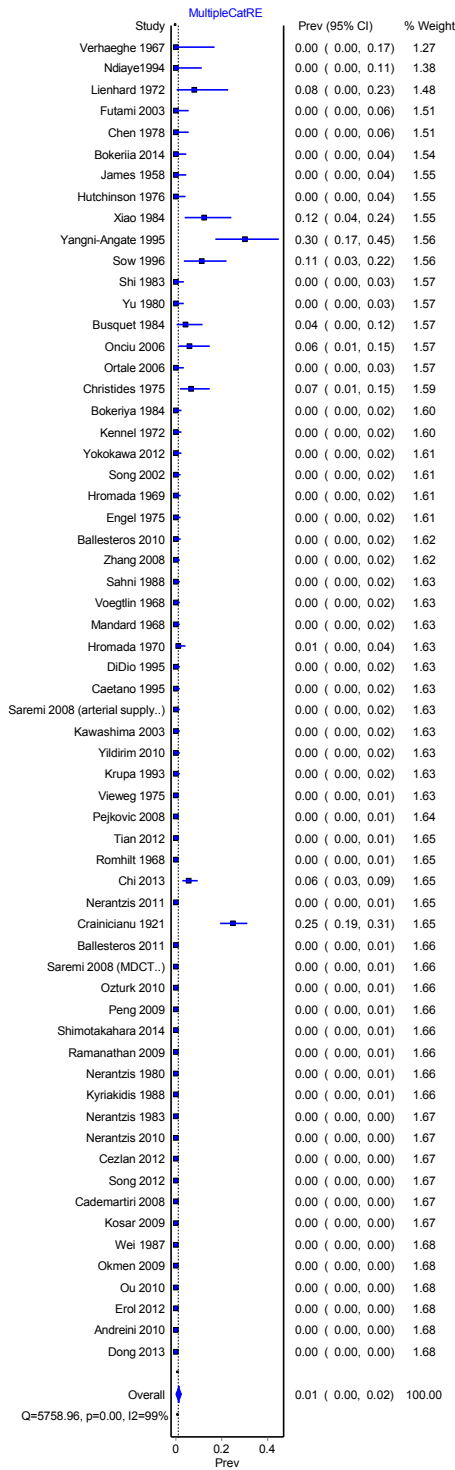

Duplicated SANa. One arising from RCA, the other arising from bronchial artery.

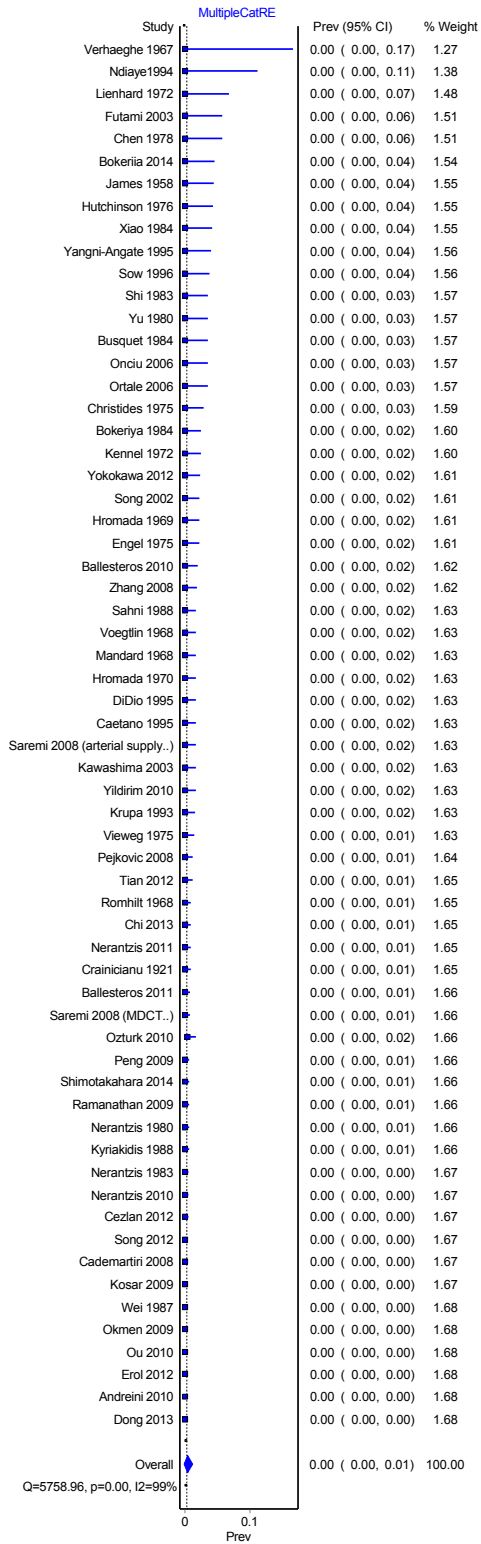



Duplicated SANa. One arising from LCX, the other arising from pulmonary artery

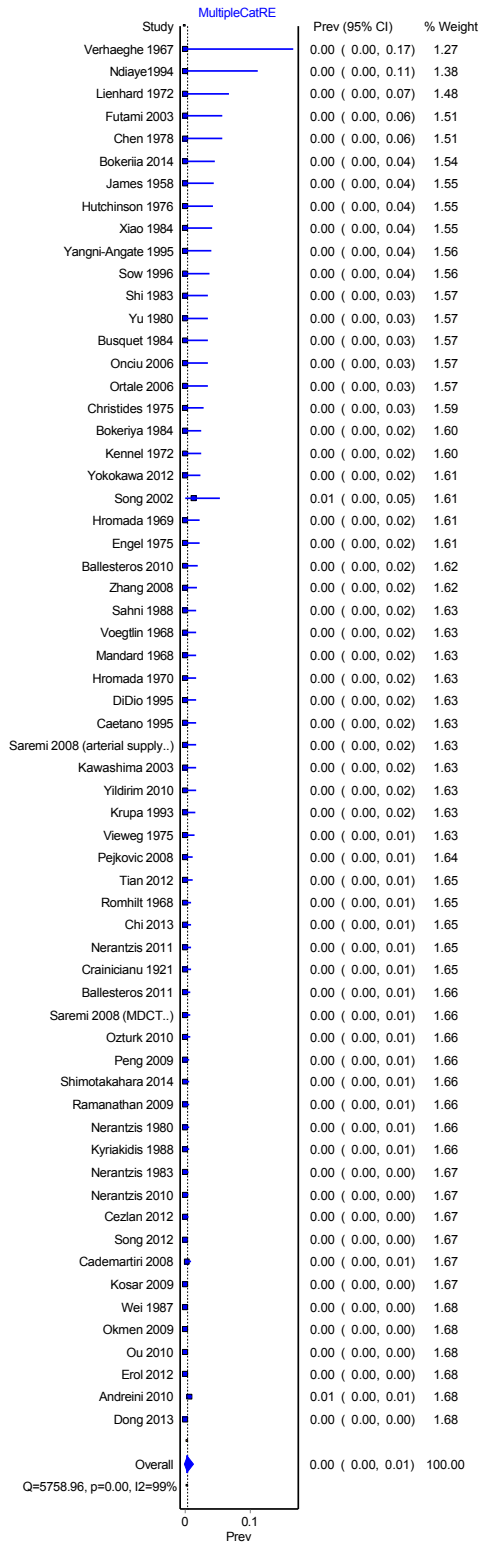

# Duplicated SANa. One arising from LCX, the other arising from bronchial artery

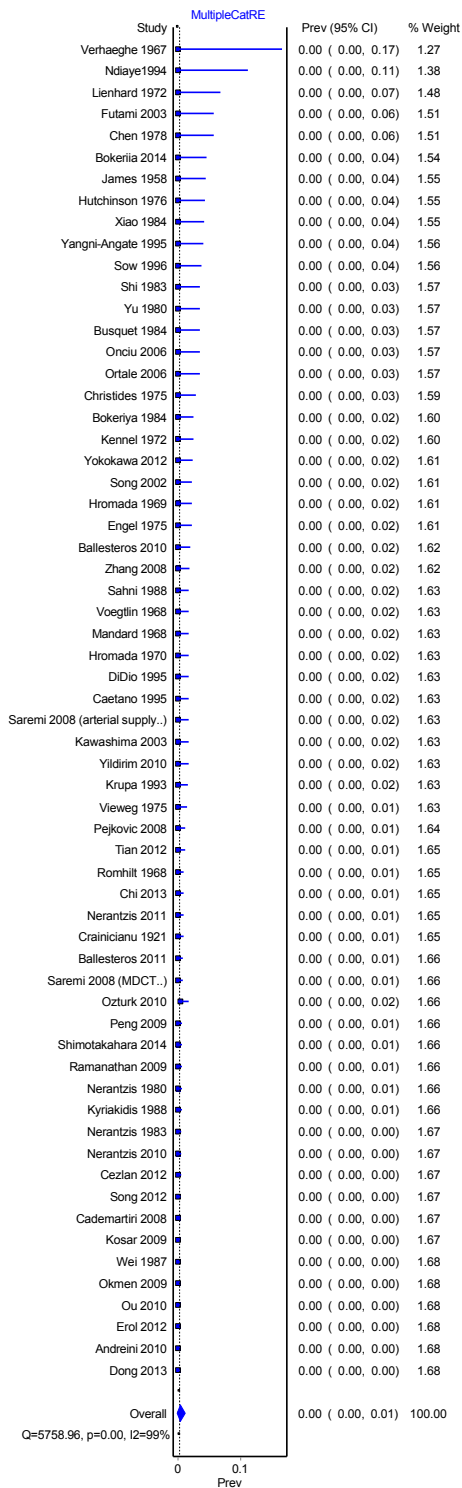

# Duplicated SANA. Both arising from RCA.

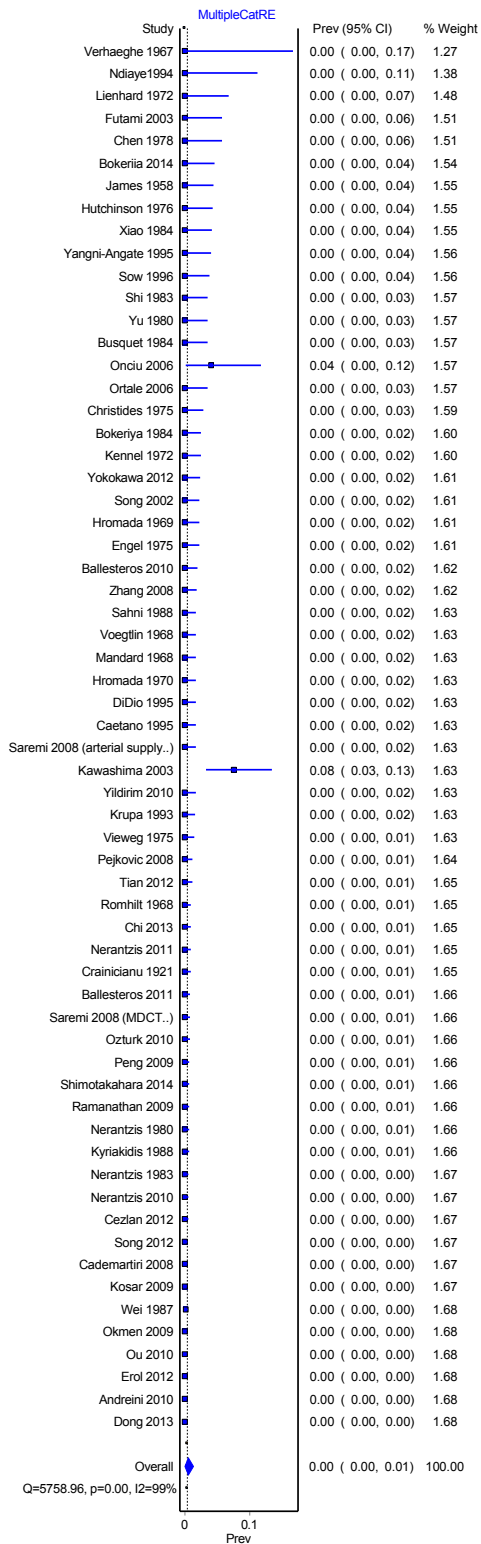

# Duplicated SANA. Both arising from LCX

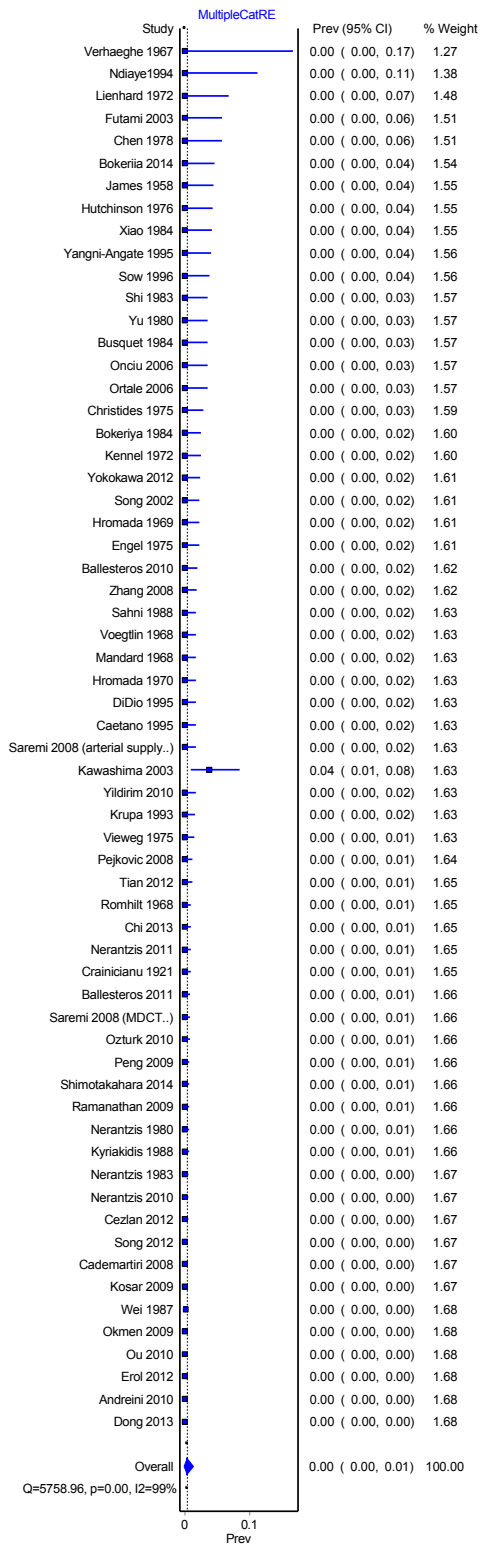

# Duplicated SANA. Both arises from LCA

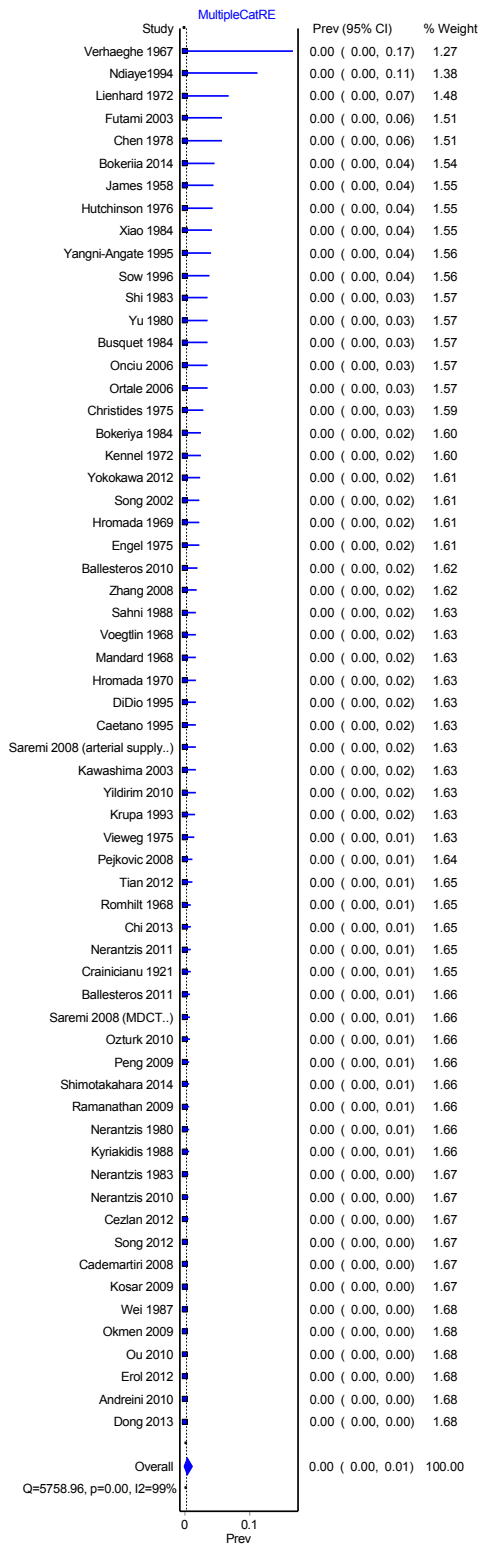

# Triplicated SANa. Two arising from RCA, the third arising from LCX

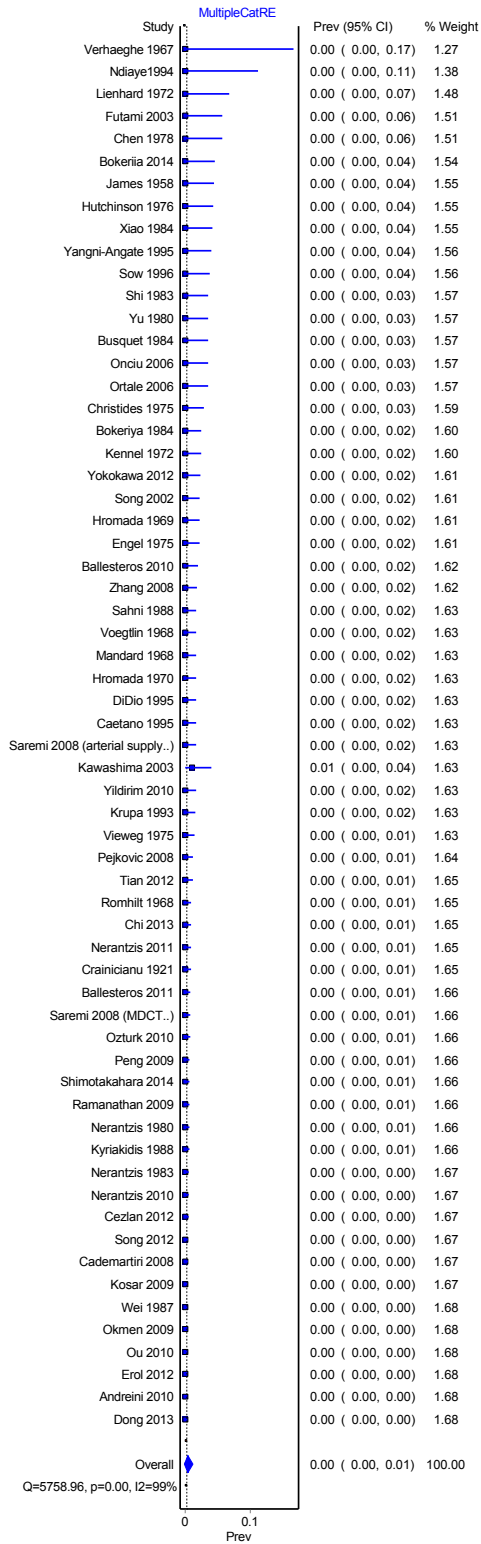

# Triplicated SANa. Two arising from LCX, the third arising from RCA

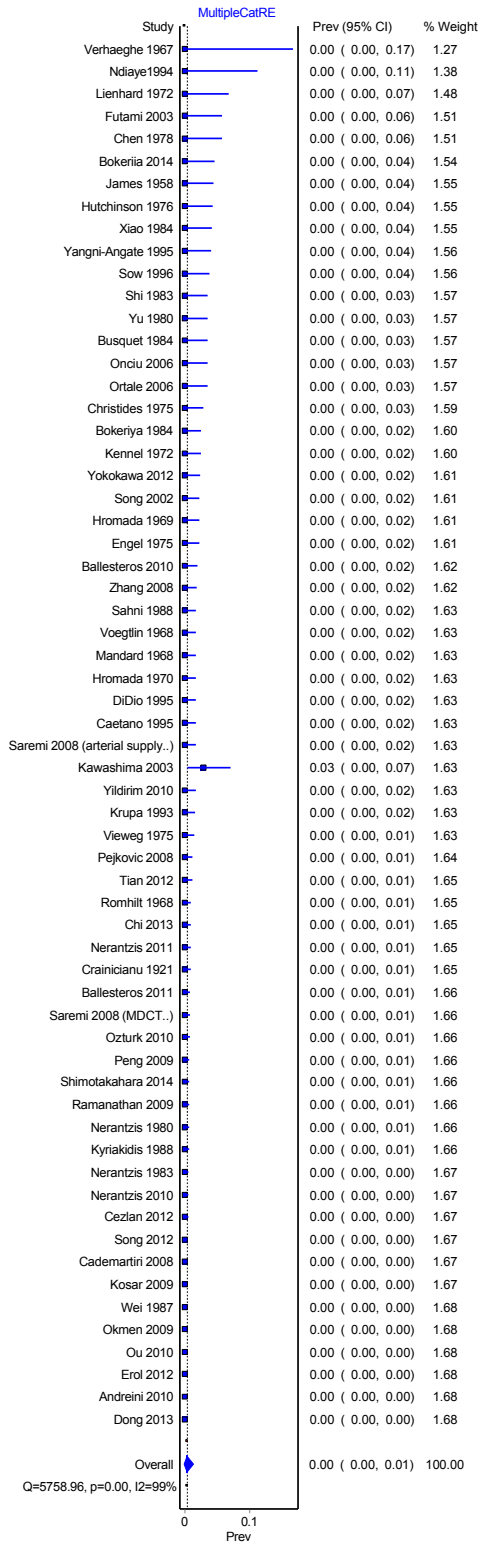

# Triplicated SANa. Two arising from RCA, the third arising from LCA

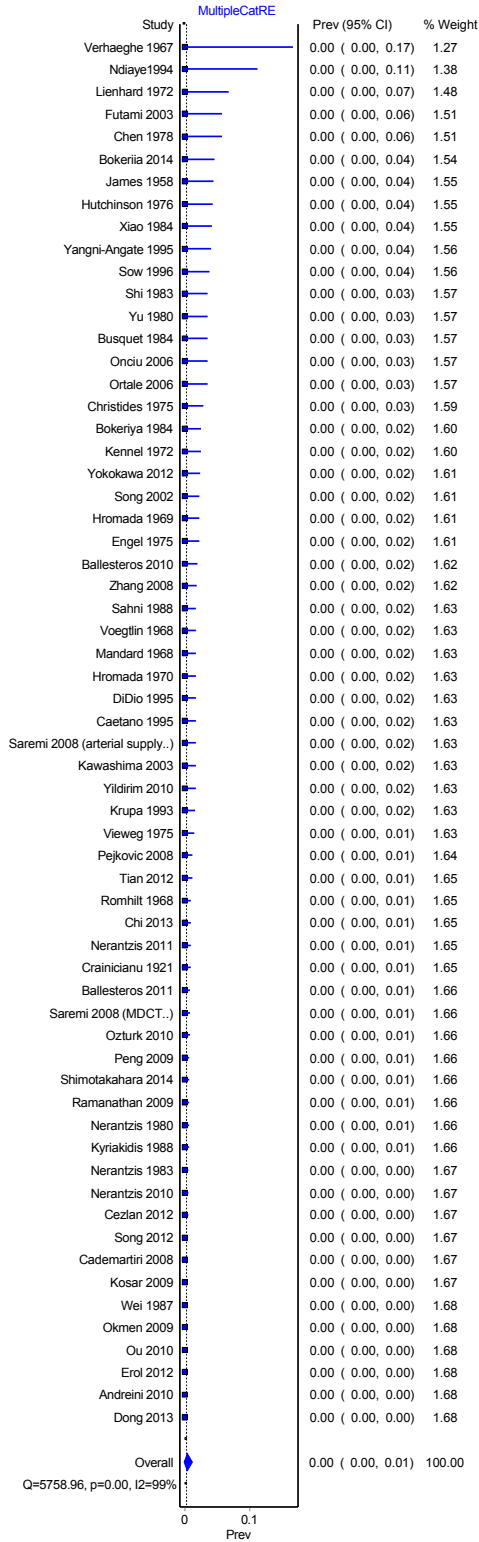



# Triplicated SANa. Two arising from RCA, the third arising from bronchial artery

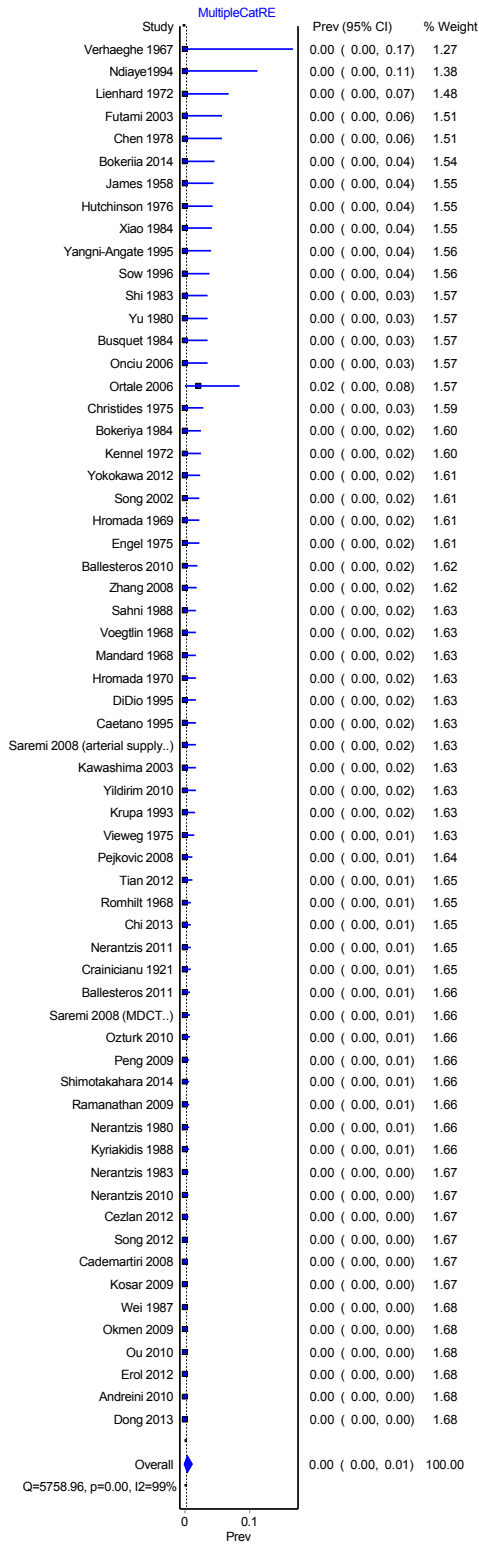

# Triplicated SANa. Two arising from bronchial artery, the third arising from RCA

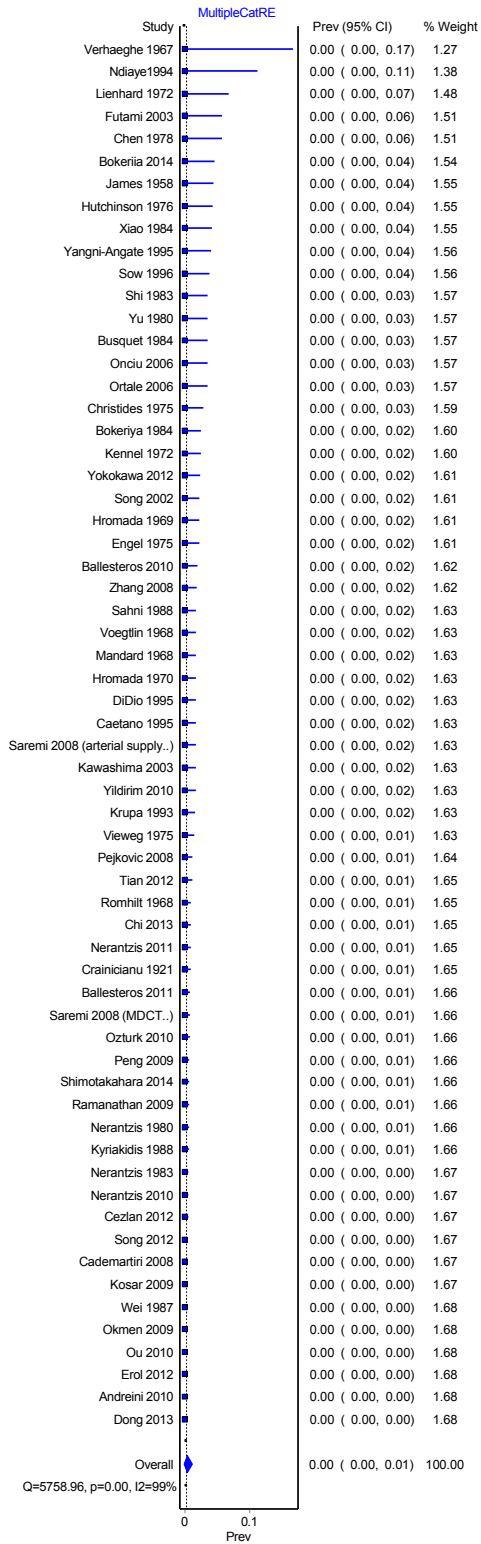

# SANa arising from right coronary sinus

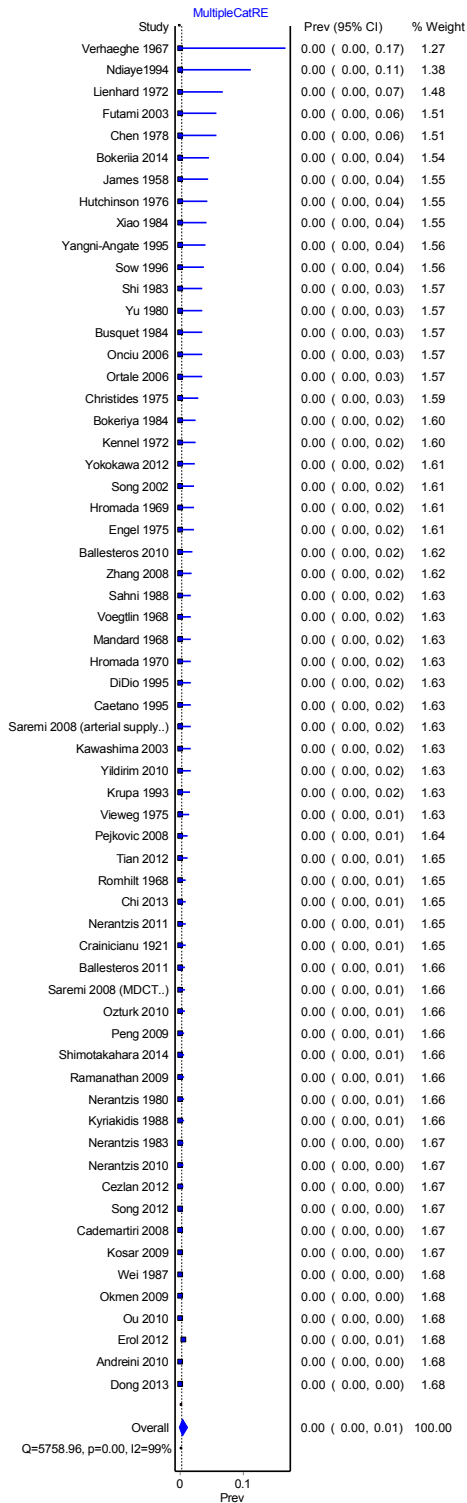

# SANa arising from left coronary sinus

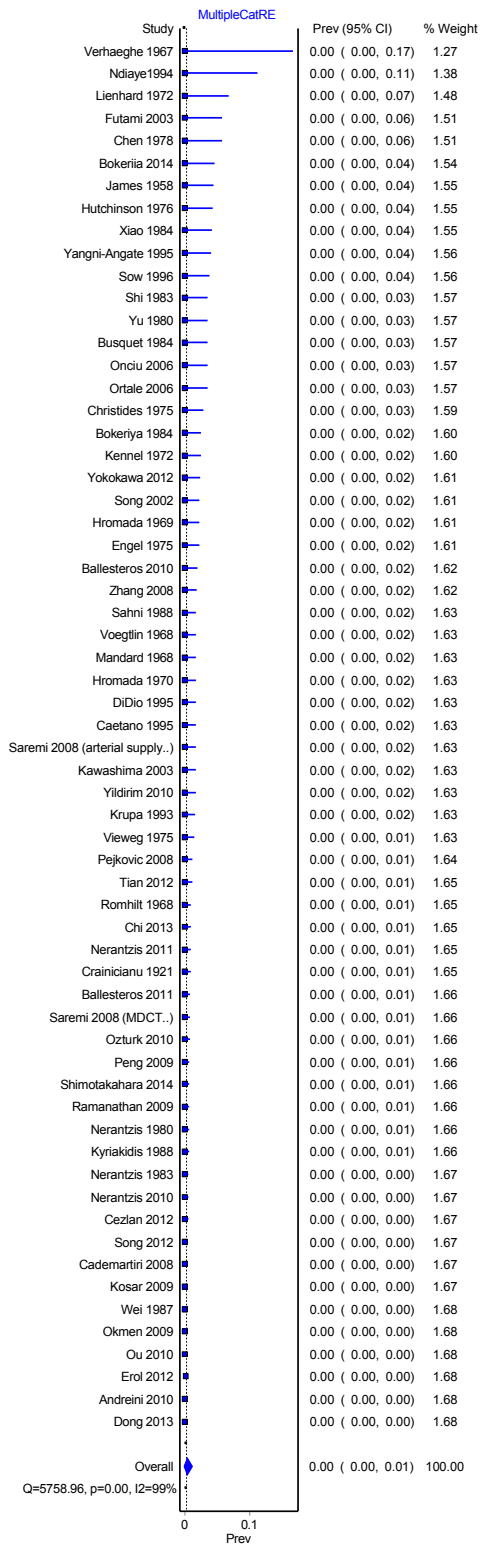

Supplement: pone.0148331.s003.pdf [file pone.0148331.s003.pdf]
