# Supplementary material for: Anatomical Variations in the Sinoatrial Nodal Artery: A Meta-Analysis and Clinical Considerations
Source: PubMed Central journal article supplement (PMC4743947; doi:10.1371/journal.pone.0148331), 2016-02-05

## Course of the sinoatrial nodal artery (SANA)

Precaval course of SANA

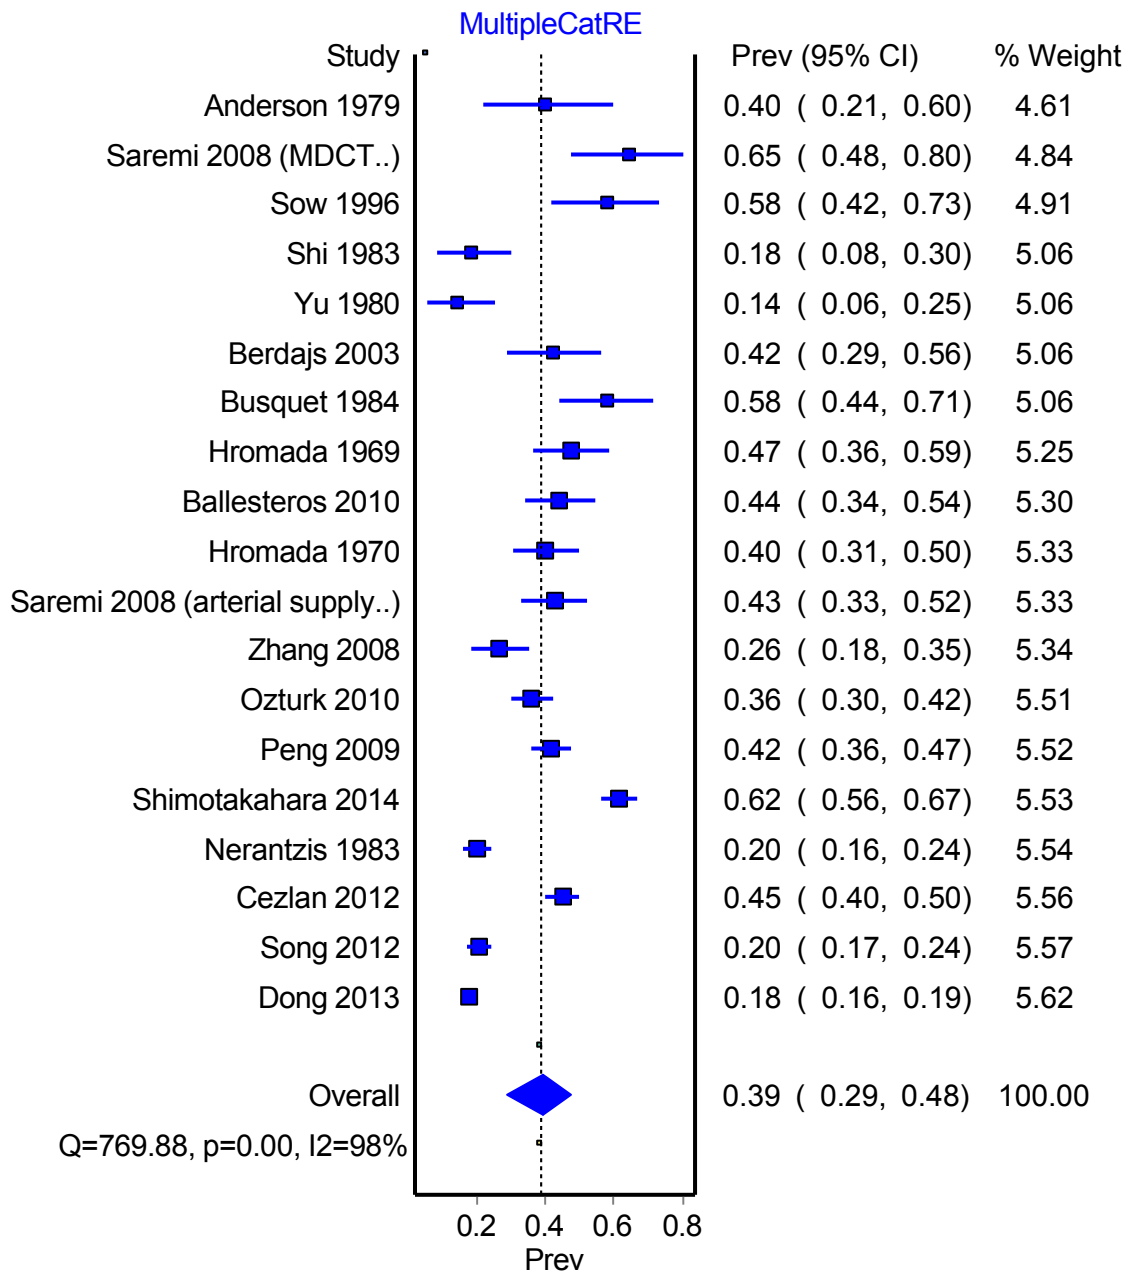

Retrocaval course of SANa

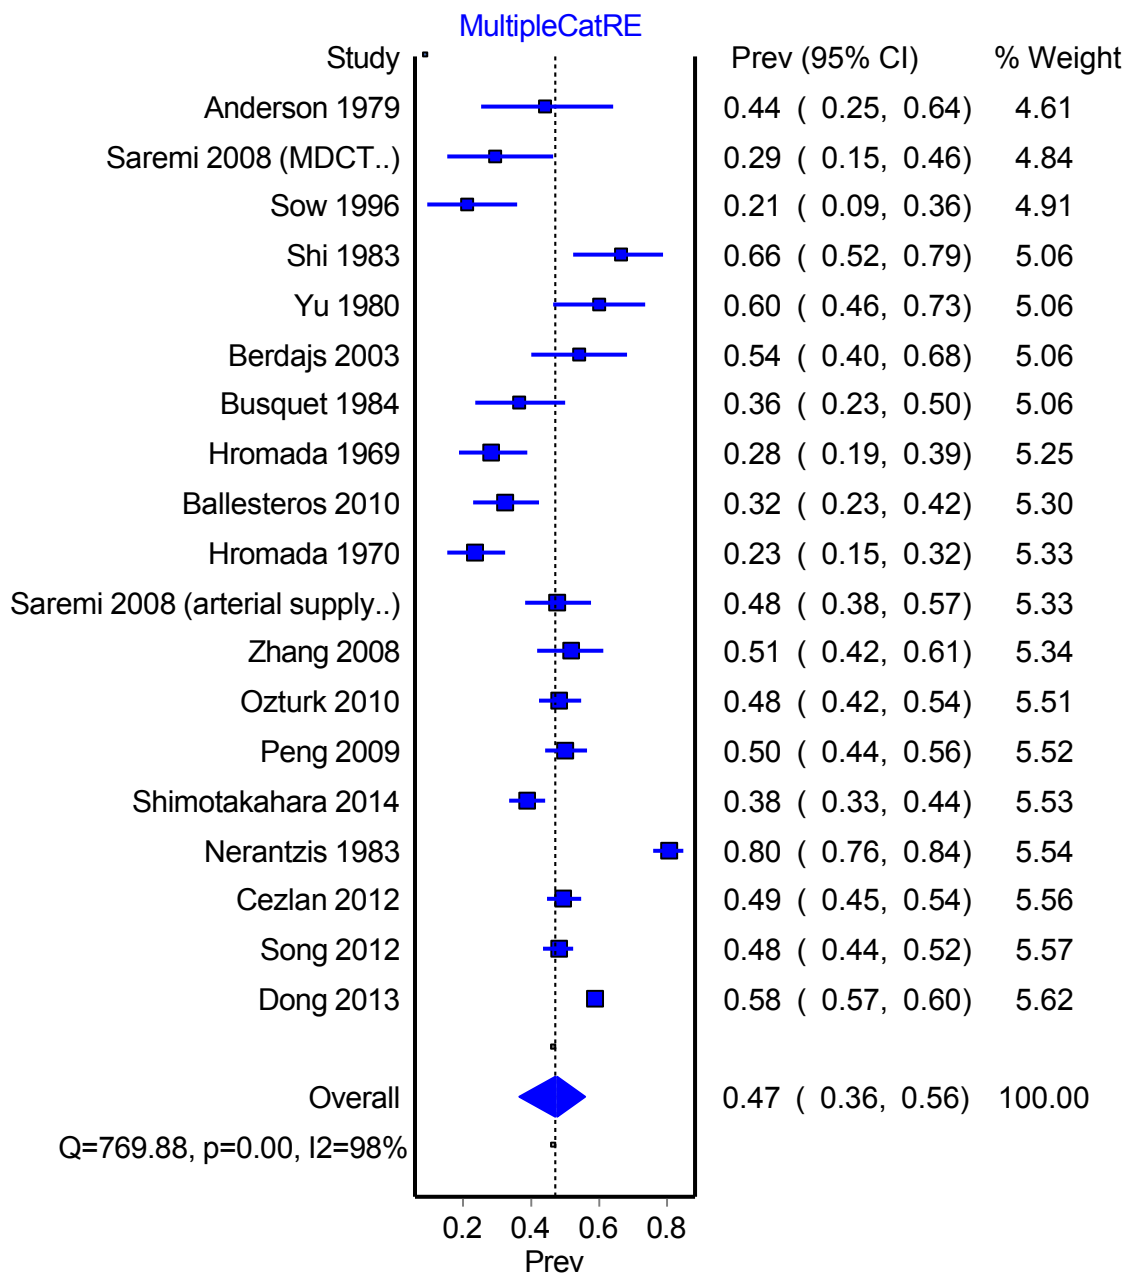

Pericaval course of SANa

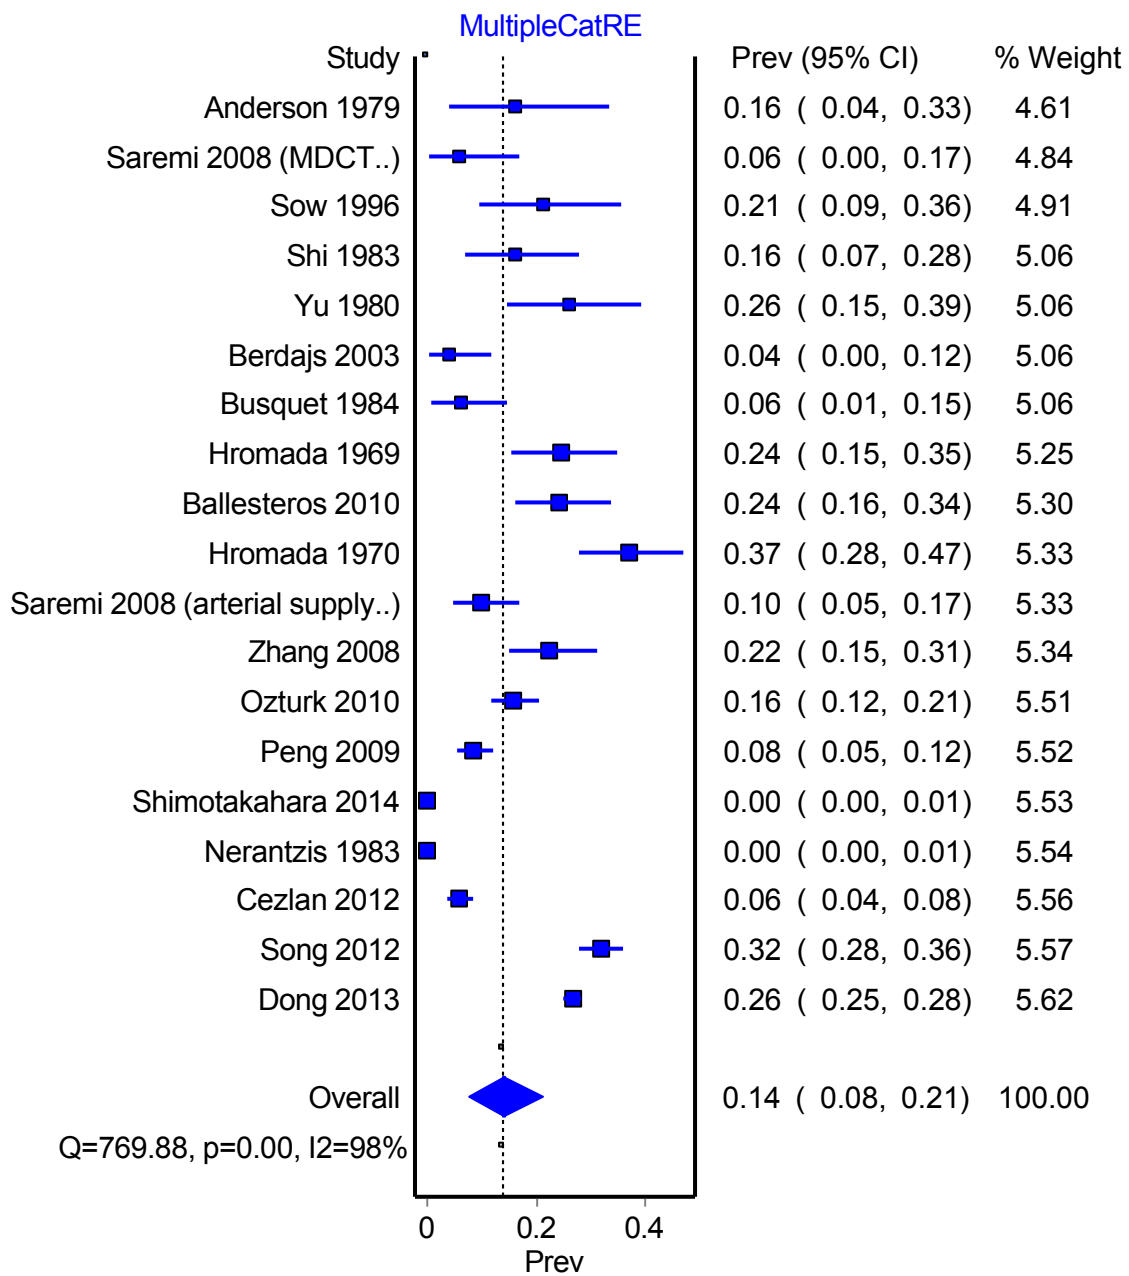

Supplement: pone.0148331.s004.pdf [file pone.0148331.s004.pdf]
