# Supplementary material for: Anatomical Variations in the Sinoatrial Nodal Artery: A Meta-Analysis and Clinical Considerations
Source: PubMed Central journal article supplement (PMC4743947; doi:10.1371/journal.pone.0148331), 2016-02-05

### S-Shaped sinoatrial nodal artery

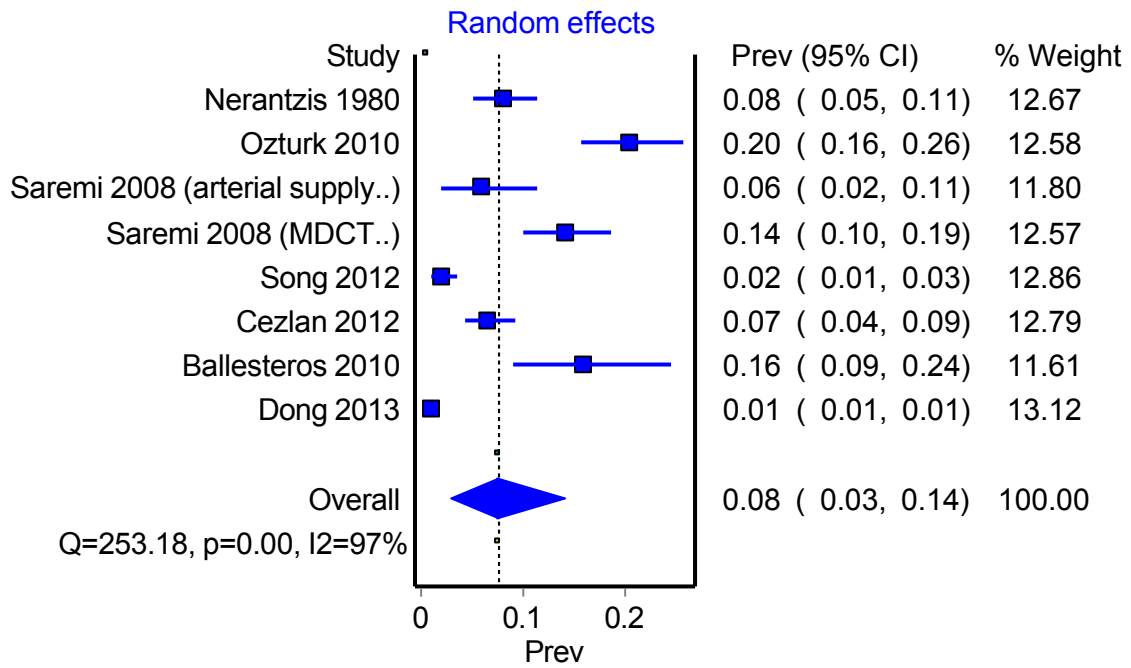

Supplement: pone.0148331.s005.pdf [file pone.0148331.s005.pdf]
